# Supplementary material for: Altered hippocampal morphology in unmedicated patients with major depressive illness
Source: PubMed Central journal article supplement — ASN Neuro. 2009 Nov 10;1(4):e00020. doi: 10.1042/AN20090026 (PMC2785515; doi:10.1042/an20090026), 2009-11-10
Supplement: an001e020add.pdf [file an001e020add.pdf]

# Altered hippocampal morphology in unmedicated patients with major depressive illness

Carrie E Bearden<sup>\*1</sup>, Paul M Thompson<sup>†</sup>, Christina Avedissian<sup>†</sup>, Andrea D Klunder<sup>†</sup>, Mark Nicoletti<sup>‡</sup>, Nicole Dierschke<sup>§</sup>, Paolo Brambilla<sup>||</sup> and Jair C Soares<sup>¶</sup>

<sup>\*</sup>Semel Institute for Neuroscience and Human Behavior, University of California, Los Angeles, CA 90095, U.S.A.

<sup>†</sup>Laboratory of Neuro Imaging, Department of Neurology, University of California, Los Angeles, CA 90095, U.S.A.

<sup>‡</sup>Department of Psychiatry, University of North Carolina School of Medicine, Chapel Hill, NC 27599-7160, U.S.A.

<sup>§</sup>Department of Psychiatry, University of Texas Health Science Center at San Antonio, San Antonio, TX 78229, U.S.A.

<sup>||</sup>Scientific Institute IRCCS, E. Medea, and Section of Psychiatry, Department of Pathology and Experimental and Clinical Medicine, University of Udine, Udine, Italy

<sup>¶</sup>Department of Psychiatry and Behavioral Sciences, University of Texas at Houston School of Medicine, 1300 Moursund Street, Houston, TX 77030, U.S.A.

**Cite this article as:** Bearden CE, Thompson PM, Avedissian C, Klunder AD, Nicoletti M, Dierschke N, Brambilla Pô and Soares JC (2009) Altered hippocampal morphology in unmedicated patients with major depressive illness. ASN NEURO 1(4):art:e00020.doi:10.1042/AN20090026

## SUPPLEMENTARY DATA

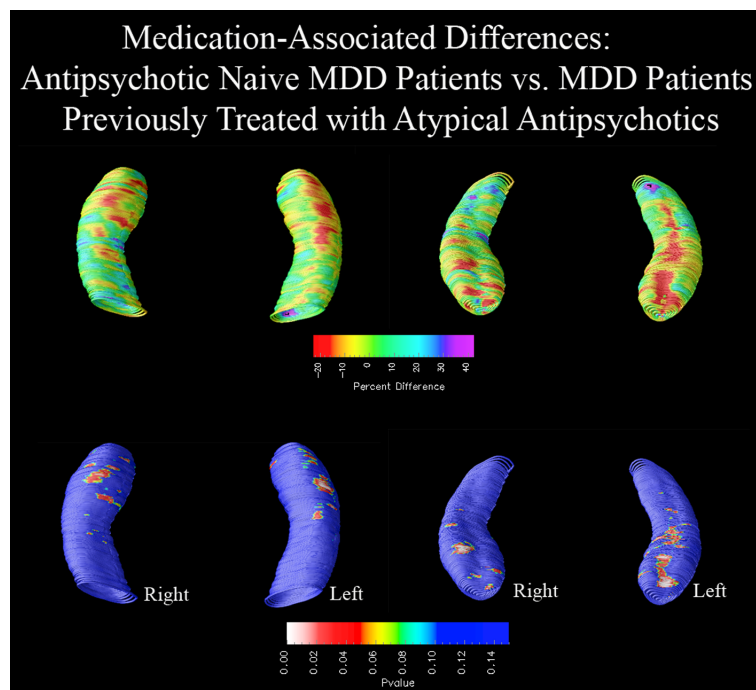

**Figure S1** Hippocampal volume as a function of prior medication usage  
Three-dimensional maps depict localized hippocampal decreases in medication-naïve MDD patients (red colours) relative to those MDD patients previously treated with atypical antipsychotics. However, these differences were not significant after correcting for multiple comparisons via permutation analysis (left,  $P=0.06$ ; right,  $P=0.07$ ).

Received 13 May 2009/25 July 2009; accepted 17 August 2009

Published as Immediate Publication 20 October 2009, doi 10.1042/AN20090026

<sup>†</sup>To whom correspondence should be addressed (email cbearden@mednet.ucla.edu).

© 2009 The Author(s) This is an Open Access article distributed under the terms of the Creative Commons Attribution Non-Commercial Licence (<http://creativecommons.org/licenses/by-nc/2.5/>) which permits unrestricted non-commercial use, distribution and reproduction in any medium, provided the original work is properly cited.
